# Supplementary material for: A colorimetric Boolean INHIBIT logic gate for the determination of sulfide based on citrate-capped gold nanoparticles
Source: Royal Society of Chemistry journal article supplement (doi:10.1039/c5ra10085b), 2015-01-01
Supplement: c5ra10085b1.pdf [file c5ra10085b1.pdf]

## Supporting information

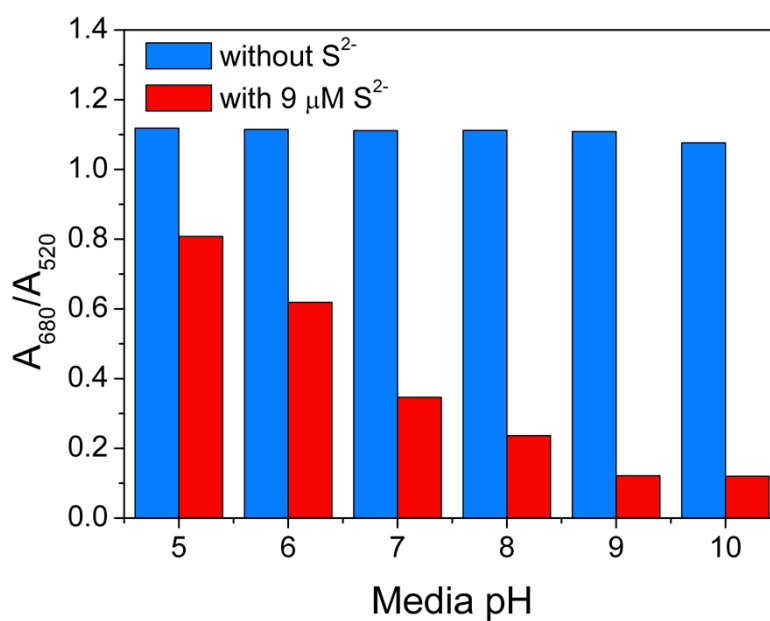

**Fig. S1** Effect of media pH on the absorbance ratio ( $A_{680}/A_{520}$ ) of the sensing system. The concentrations of TU were all 5  $\mu\text{M}$ .

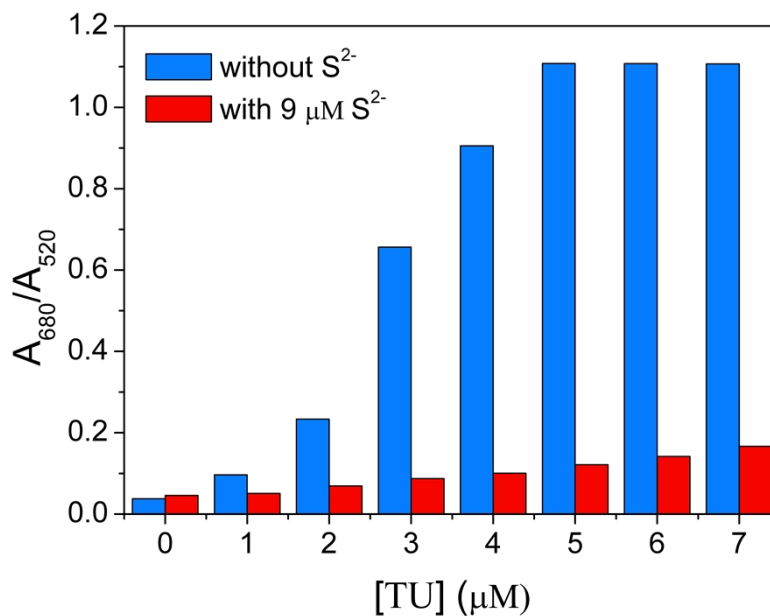

**Fig. S2** Effect of the concentration of TU on the absorbance ratio ( $A_{680}/A_{520}$ ) of sensing system.

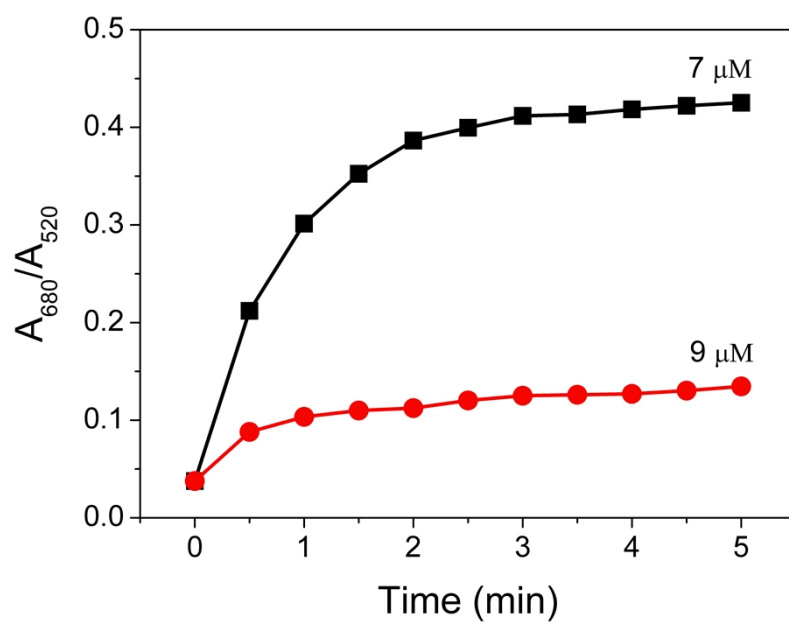

**Fig. S3** Effect of incubation time on the absorbance ratio ( $A_{680}/A_{520}$ ) of the sensing system.

The concentration of  $\text{S}^{2-}$  was 7 and  $9 \mu\text{M}$ .
